# Supplementary material for: Erratum: Effectiveness and Safety of Apixaban versus Warfarin as Outpatient Treatment of Venous Thromboembolism in U.S. Clinical Practice
Source: PubMed Central journal article supplement — Thromb Haemost. 2020 Jan 27;118(11):e1–2. doi: 10.1055/s-0039-3400530 (PMC8548234; doi:10.1055/s-0039-3400530), 2020-01-27
Supplement: 10-1055-s-0039-3400530-s180391erratum.pdf [file 10-1055-s-0039-3400530-s180391erratum.pdf]

Online Supplement – Table 1. Selection of patients receiving apixaban or warfarin as outpatient therapy for VTE

| Inclusion/Exclusion Criteria<br>Setting of Subject                                                                                                                                                                                                                                                                                                                                                                                                                                                                                                                                                                                                                                                                                                                                                                                                                                    | Humans (n [%])                                                                                                                                                            |                                                                                                                                                                           | Market Size (n [%])                                                                                                                                                    |                                                                                                                                                                                  | Opioid (n [%]) |               | Pharmetrics (n [%]) |                | Total            |               | Total Population (n [%]) |                    |
|---------------------------------------------------------------------------------------------------------------------------------------------------------------------------------------------------------------------------------------------------------------------------------------------------------------------------------------------------------------------------------------------------------------------------------------------------------------------------------------------------------------------------------------------------------------------------------------------------------------------------------------------------------------------------------------------------------------------------------------------------------------------------------------------------------------------------------------------------------------------------------------|---------------------------------------------------------------------------------------------------------------------------------------------------------------------------|---------------------------------------------------------------------------------------------------------------------------------------------------------------------------|------------------------------------------------------------------------------------------------------------------------------------------------------------------------|----------------------------------------------------------------------------------------------------------------------------------------------------------------------------------|----------------|---------------|---------------------|----------------|------------------|---------------|--------------------------|--------------------|
|                                                                                                                                                                                                                                                                                                                                                                                                                                                                                                                                                                                                                                                                                                                                                                                                                                                                                       | Apixaban                                                                                                                                                                  | Warfarin                                                                                                                                                                  | Apixaban                                                                                                                                                               | Warfarin                                                                                                                                                                         | Apixaban       | Warfarin      | Apixaban            | Warfarin       | Apixaban         | Warfarin      | Apixaban                 | Warfarin           |
| <b>Inclusion criteria:</b><br>Aged ≥18 years with diagnosis of VTE from September 1, 2014 to June 30, 2017;<br>Setting – Outpatient<br>Ambulatory Care                                                                                                                                                                                                                                                                                                                                                                                                                                                                                                                                                                                                                                                                                                                                | 22,647 (100.0%)                                                                                                                                                           | 380,031 (100.0%)                                                                                                                                                          | ---                                                                                                                                                                    | ---                                                                                                                                                                              | ---            | ---           | ---                 | ---            | 463,551 (100.0%) | ---           | ---                      | 1,386,331 (100.0%) |
| <b>Diagnosis:</b><br>Diagnosis of PE (with or without DVT)<br>Diagnosis of DVT Only<br>Prescribed with<br>Unprovoked<br>plus ≥1 consecutive pharmacy claim for apixaban or warfarin during 30-day period following the index encounter<br>plus ≥1 consecutive pharmacy claim for apixaban or warfarin during 30-month period prior to index therapy                                                                                                                                                                                                                                                                                                                                                                                                                                                                                                                                   | 6,428 (28.4%)<br>153,231 (67.8%)<br>67,668 (30.0%)<br>153,979 (68.5%)<br>10,034 (4.5%)<br>8,613 (3.8%)                                                                    | 110,496 (29.1%)<br>79,885 (20.9%)<br>94,838 (25.0%)<br>285,199 (75.0%)<br>79,885 (20.9%)<br>69,374 (18.3%)                                                                | ---                                                                                                                                                                    | ---                                                                                                                                                                              | ---            | ---           | ---                 | ---            | ---              | ---           | ---                      | ---                |
| <b>Exclusion criteria:</b><br>plus no claims for conditions/procedures:<br>No claims for atrial fibrillation/flutter during 6-month period prior to index therapy<br>No claims for myocardial infarction during 6-month period prior to index therapy<br>No claims for stroke during 6-month period prior to index therapy<br>No claims for malignancy during 90-day period prior to index therapy<br>No claims for VTE during study period<br>plus no evidence of any OAC/PAC use during 30-day period prior to index encounter<br>plus no evidence of receipt of ≥1 OAC during period between index encounter and index therapy initiation**<br>plus no claims for VTE during 6-month period prior to index encounter<br>plus evidence of PAC within +/- 14 days of warfarin initiation (ambulatory care only)<br>plus evidence of PAC during 6-month period prior to index therapy | 23,293 (102.8%)<br>19,724 (87.1%)<br>4,852 (21.5%)<br>4,830 (21.4%)<br>4,637 (20.6%)<br>4,614 (20.5%)<br>4,566 (20.4%)<br>4,566 (20.4%)<br>3,719 (16.4%)<br>3,318 (14.7%) | 23,293 (102.8%)<br>19,724 (87.1%)<br>4,852 (21.5%)<br>4,830 (21.4%)<br>4,637 (20.6%)<br>4,614 (20.5%)<br>4,566 (20.4%)<br>4,566 (20.4%)<br>3,719 (16.4%)<br>3,318 (14.7%) | 8,883 (39.2%)<br>7,224 (32.2%)<br>7,357 (32.6%)<br>7,357 (32.6%)<br>6,975 (30.7%)<br>6,892 (30.8%)<br>6,656 (30.2%)<br>6,656 (30.2%)<br>5,748 (25.6%)<br>4,356 (19.2%) | 48,547 (21.5%)<br>41,585 (18.8%)<br>40,555 (18.2%)<br>40,555 (18.2%)<br>39,707 (17.9%)<br>37,264 (16.9%)<br>37,373 (17.0%)<br>37,373 (17.0%)<br>30,633 (13.8%)<br>29,629 (13.2%) | ---            | ---           | ---                 | ---            | ---              | ---           | ---                      |                    |
| <b>Study Population</b>                                                                                                                                                                                                                                                                                                                                                                                                                                                                                                                                                                                                                                                                                                                                                                                                                                                               | 3,719 (16.4%)                                                                                                                                                             | 5,949 (27.0%)                                                                                                                                                             | 5,748 (25.6%)                                                                                                                                                          | 9,069 (41.9%)                                                                                                                                                                    | 14,817 (6.8%)  | 4,418 (20.1%) | 6,075 (27.8%)       | 10,106 (46.7%) | 16,781 (7.6%)    | 20,661 (9.3%) | 35,980 (16.5%)           | 55,641 (4.0%)      |
| <b>Matched Patients</b><br>DVT, PE, Atrial Fibrillation, PAC, Inferior vena cava filter, OAC, Oral anticoagulant, PAC, Parenteral anticoagulant, PE, Pulmonary embolism, VTE, Venous thromboembolism<br>*Other than non-melanoma skin cancer<br>**Prophylactic use of OAC/PAC will be determined based on duration and timing of use (See Appendix B)<br>Including date of index encounter and date of index therapy initiation                                                                                                                                                                                                                                                                                                                                                                                                                                                       | 3,318 (14.7%)                                                                                                                                                             | 5,249 (23.5%)                                                                                                                                                             | 4,356 (19.2%)                                                                                                                                                          | 4,356 (19.2%)                                                                                                                                                                    | 4,245 (19.1%)  | 4,245 (19.1%) | 5,961 (27.0%)       | 5,961 (27.0%)  | 11,922 (53.9%)   | 17,878 (8.1%) | 17,878 (8.1%)            | 35,756 (2.6%)      |
